# Supplementary material for: Investigation into the glucose-regulating acitivity and mechanisms of Siraitia grosvenorii extracts and their application in the innovation of functional biscuits
Source: Research Square preprint supplement (doi:10.21203/rs.3.rs-7147970/v1), 2025-08-26
Supplement: Supplementary file 1 [file 5736e2c6256fabdf1becb640.docx]

**Highlights**

*Siraitia grosvenorii* extract and its individual compounds can effectively inhibit the activity of *α*-amylase.

Compounds **1**-**5** act as mixed-type inhibitors of PPA, capable of simultaneously binding to both free PPA and the PPA-starch complex.

The addition of *Siraitia grosvenorii* to the biscuits significantly elevated their flavor, imparting a unique and delightful taste that truly enhances the overall sensory experience.

*Siraitia grosvenorii* serves as a natural sweetener, providing hypoglycemic effects without affecting the texture of the biscuits.
