# Supplementary figures and images for: Investigation into the glucose-regulating acitivity and mechanisms of Siraitia grosvenorii extracts and their application in the innovation of functional biscuits
Source: Research Square preprint supplement (doi:10.21203/rs.3.rs-7147970/v1), 2025-08-26

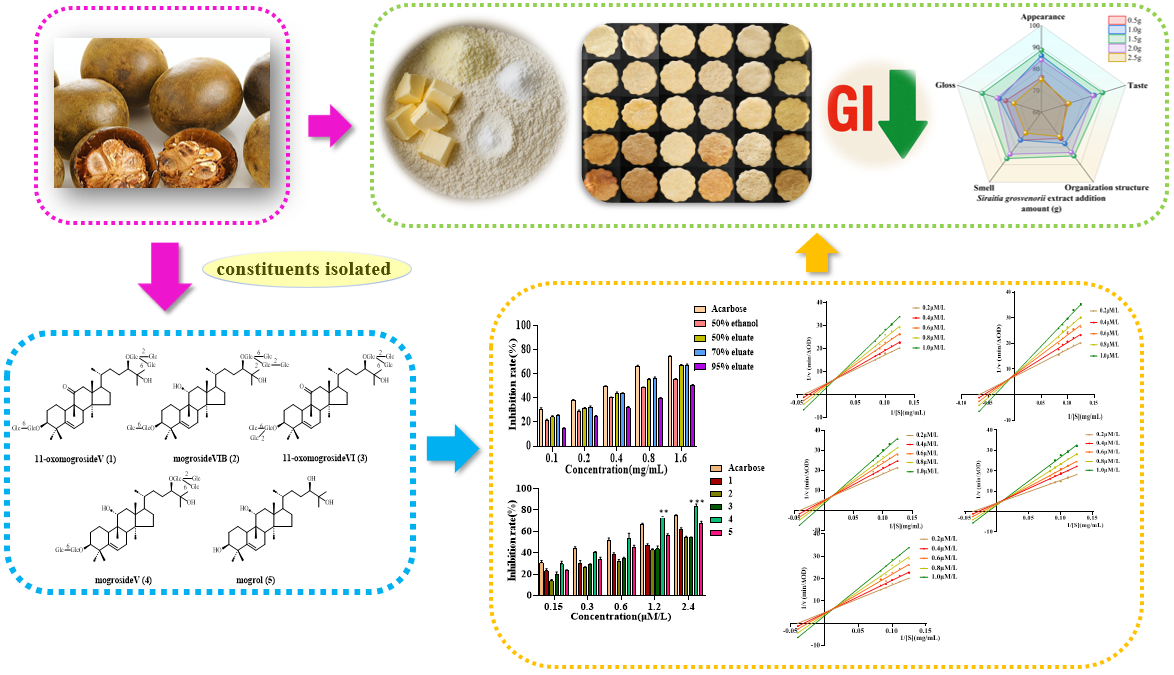

Supplement: Supplementary file 2 [file addb17755827f00129e1e93c.docx]
